# Supplementary material
Source: PubMed Central journal article supplement (PMC3222957)
Supplement: NIHMS334800-supplement-supplementary_data.pdf [file NIHMS334800-supplement-supplementary_data.pdf]

# Supplementary Materials for Linear or Nonlinear? Automatic Structure Discovery for Partially Linear Models

Hao Helen Zhang\*, Guang Cheng and Yufeng Liu

The supplementary material contains the proof of Theorem 2.

## Appendix 4. Proof of Theorem 2

It suffices to show that, with probability tending to one,

$$\mathcal{P}_{1j}\widehat{g} = 0 \iff \mathcal{P}_{1j}g_0 = 0, \quad (8.18)$$

$$\widehat{\beta}_j = 0 \iff \beta_j^0 = 0 \quad (8.19)$$

for  $j = 1, \dots, d$ . Without loss of generality, we focus on the case  $d = 2$ , i.e.  $g(x_1, x_2) = b + \beta_1 k_1(x_1) + \beta_2 k_1(x_2) + g_{11}(x_1) + g_{12}(x_2)$ , where  $g_{1j}(x_j) \in \mathcal{S}_{per,j}$ , in the proof. Note that in this case the sample size  $n$  is  $m^2$  since we assume  $n_1 = n_2 = m$ . We have three major steps in the proof.

### Step I: Formulation

Let  $\Sigma = \{R_1(x_{i,1}, x_{k,1})\}_{i,k=1}^m$  be the  $m \times m$  marginal Gram matrix corresponding to the reproducing kernel for  $\mathcal{S}_{per}$ . Let  $\mathbf{1}_m$  be a vector of  $m$  ones. Assuming the observations are permuted appropriately, we can write the  $n \times n$  Gram matrix  $\mathbf{R}_{11} = \Sigma \odot (\mathbf{1}_m \mathbf{1}_m')$  and  $\mathbf{R}_{12} = (\mathbf{1}_m \mathbf{1}_m') \odot \Sigma$ , where  $\odot$  stands for the Kronecker product between two matrices. Let  $\{\boldsymbol{\xi}_1 = \mathbf{1}_m, \boldsymbol{\xi}_2, \dots, \boldsymbol{\xi}_m\}$  be an orthonormal (with respect to the inner product  $\langle \cdot \rangle_m$  in  $\mathcal{R}^m$ ) eigensystem of  $\Sigma$  with corresponding eigenvalues  $m\eta_1, \dots, m\eta_m$  where  $\eta_1 = (720m^4)^{-1}$ . Thus, we have

$$\begin{aligned} \langle \boldsymbol{\xi}_1, \boldsymbol{\xi}_j \rangle_m = 0 &\implies \frac{1}{m} \sum_{i=1}^m \xi_{ij} = 0 \text{ for } j \geq 2, \\ \langle \boldsymbol{\xi}_j, \boldsymbol{\xi}_j \rangle_m = 1 &\implies \frac{1}{m} \sum_{i=1}^m \xi_{ij}^2 = 1 \text{ for } j \geq 1. \end{aligned}$$

From Utreras (1983), we know that  $\eta_2 \geq \eta_3 \geq \dots \geq \eta_m$  and  $\eta_i \sim i^{-4}$  for  $i \geq 2$ .

Let  $\Upsilon$  be the  $m \times m$  matrix with  $\{\boldsymbol{\xi}_1, \dots, \boldsymbol{\xi}_m\}$  as its columns. We then define a  $n \times n$  matrix  $\mathbf{O} = \Upsilon \odot \Upsilon$ . It is easy to verify that the columns of  $\mathbf{O}$ , i.e.  $\{\tilde{\boldsymbol{\xi}}_i : i = 1, 2, \dots, n\}$ , form an eigensystem for each of  $\mathbf{R}_{11}$  and  $\mathbf{R}_{12}$ . We next rearrange the columns of  $\mathbf{O}$  to form  $\{\boldsymbol{\zeta}_{1j}, \dots, \boldsymbol{\zeta}_{nj}\}$  so that their first  $m$  elements are those corresponding to nonzero eigenvalues for  $\mathbf{R}_{1j}$  and the rest  $(n-m)$  elements are given by the remaining  $\tilde{\boldsymbol{\xi}}_i$  for  $j = 1, 2$ . The corresponding eigenvalues are then  $\eta_{ij} = n\eta_i$  for  $i = 1, \dots, m$  and zero otherwise. It is clear that  $\{\tilde{\boldsymbol{\xi}}_1, \dots, \tilde{\boldsymbol{\xi}}_n\}$  is also an orthonormal basis in  $\mathbb{R}^n$  with respect to the inner product  $\langle \mathbf{u}, \mathbf{v} \rangle_n$ . Thus we have  $\mathbf{O}'\mathbf{O} = n\mathbf{I}$  and  $\mathbf{O}\mathbf{O}' = n\mathbf{I}$ .

Recall that our estimate  $(\hat{\boldsymbol{\beta}}, \hat{g}_{11}, \hat{g}_{12})$  is obtained by minimizing

$$\frac{1}{n} (\mathbf{y} - \mathbf{T}\boldsymbol{\beta} - \mathbf{R}_{\mathbf{w}_1, \boldsymbol{\theta}\mathbf{c}})' (\mathbf{y} - \mathbf{T}\boldsymbol{\beta} - \mathbf{R}_{\mathbf{w}_1, \boldsymbol{\theta}\mathbf{c}}) + \lambda_1 \sum_{j=1}^d w_{0j} |\beta_j| + \tau_0 \mathbf{c}' \mathbf{R}_{\mathbf{w}_1, \boldsymbol{\theta}\mathbf{c}} \mathbf{c} + \tau_1 \sum_{j=1}^d w_{1j} \theta_j, \quad (8.20)$$

over  $(\boldsymbol{\beta}, \mathbf{c}, \boldsymbol{\theta})$ , see (5.3). For simplicity, we hold  $\tau_0 = 1$ . By using the special construction of  $\mathbf{O}$ , i.e.  $\mathbf{O}\mathbf{O}' = n\mathbf{I}$ , we can rewrite (8.20) as

$$(\mathbf{z} - \mathbf{O}'\mathbf{T}\boldsymbol{\beta}/n - \mathbf{D}_\theta \mathbf{s})' (\mathbf{z} - \mathbf{O}'\mathbf{T}\boldsymbol{\beta}/n - \mathbf{D}_\theta \mathbf{s}) + \lambda_1 \sum_{j=1}^d w_{0j} |\beta_j| + \mathbf{s}' \mathbf{D}_\theta \mathbf{s} + \tau_1 \sum_{j=1}^d w_{1j} \theta_j, \quad (8.21)$$

where  $\mathbf{z} = (1/n)\mathbf{O}'\mathbf{y}$ ,  $\mathbf{s} = \mathbf{O}'\mathbf{c}$ ,  $\mathbf{D}_\theta = \sum_{j=1}^d \theta_j w_{1j}^{-1} \mathbf{D}_j$  and  $\mathbf{D}_j = (1/n^2)\mathbf{O}'\mathbf{R}_{1j}\mathbf{O}$  is a diagonal  $n \times n$  matrix with diagonal elements  $\eta_{ij}$ . We further write  $\mathbf{O}'\mathbf{T}\boldsymbol{\beta}/n = (b, 0, 0, \dots) + \mathbf{O}'\mathbf{t}_1\beta_1/n + \mathbf{O}'\mathbf{t}_2\beta_2/n$ , where  $\mathbf{T} = (\mathbf{1}_n, \mathbf{t}_1, \mathbf{t}_2)$  and

$$\mathbf{t}_1 = (1/m - 1/2, 2/m - 1/2, \dots, 1 - 1/2)' \otimes \mathbf{1}_m, \quad (8.22)$$

$$\mathbf{t}_2 = \mathbf{1}_m \otimes (1/m - 1/2, 2/m - 1/2, \dots, 1 - 1/2)'. \quad (8.23)$$

Due to the orthogonality of basis  $\{\boldsymbol{\zeta}_{1j}, \dots, \boldsymbol{\zeta}_{nj}\}$  for any  $j$ , we can further write (8.21) as

$$L(\mathbf{s}, \boldsymbol{\beta}, \boldsymbol{\theta}) = (z_{11} - b - t_{1,11}\beta_1 - t_{2,11}\beta_2 - \theta_1 \eta_{11} s_{11})^2 + \left( \sum_{i=2}^m \sum_{j=1}^d + \sum_{i=1}^1 \sum_{j=2}^d \right) (z_{ij} - t_{1,ij}\beta_1 - t_{2,ij}\beta_2 - \theta_j \eta_{ij} s_{ij})^2 + \sum_{i=1}^m \sum_{j=1}^d \eta_{ij} \theta_j w_{1j}^{-1} s_{ij}^2 + \lambda_1 \sum_{j=1}^d w_{0j} |\beta_j| + \tau_1 \sum_{j=1}^d w_{1j} \theta_j, \quad (8.24)$$

where  $t_{1,ij} = \boldsymbol{\zeta}'_{ij} \mathbf{t}_1/n$ ,  $t_{2,ij} = \boldsymbol{\zeta}'_{ij} \mathbf{t}_2/n$ ,  $z_{ij} = \boldsymbol{\zeta}'_{ij} \mathbf{y}/n$  and  $s_{ij} = \boldsymbol{\zeta}'_{ij} \mathbf{c}$ .

Note that our estimate  $(\widehat{\beta}, \widehat{g}_{11}, \widehat{g}_{12})$  are related to the minimizer of (8.24), denoted by  $(\widehat{\beta}, \widehat{s}, \widehat{\theta})$ , as shown in (5.2). Thus, we first analyze  $(\widehat{\beta}, \widehat{s}, \widehat{\theta})$ . Straightforward calculation shows that  $\widehat{s}_{11} = 0$  and  $z_{11} - \widehat{b} - t_{1,11}\widehat{\beta}_1 - t_{2,11}\widehat{\beta}_2 = 0$ . Thus, we only need to consider minimizing

$$L_1(\mathbf{s}, \beta_1, \beta_2, \boldsymbol{\theta}) = \left( \sum_{i=2}^m \sum_{j=1}^d + \sum_{i=1}^1 \sum_{j=2}^d \right) \left[ \left( z_{ij} - t_{1,ij}\beta_1 - t_{2,ij}\beta_2 - \theta_j w_{1j}^{-1} \eta_{ij} s_{ij} \right)^2 + \eta_{ij} \theta_j s_{ij}^2 \right] \\ + \lambda_1 \sum_{j=1}^d w_{0j} |\beta_j| + \tau_1 \sum_{j=1}^d w_{1j} \theta_j, \quad (8.25)$$

We minimize  $L_1(\mathbf{s}, \beta_1, \beta_2, \boldsymbol{\theta})$  in two steps. Given fixed  $(\beta_1, \beta_2, \boldsymbol{\theta})$ , we first minimize  $L_1$  over  $\mathbf{s}$ . Since  $L_1$  is a convex function in  $\mathbf{s}$ , we can obtain the minimizer

$$\widehat{s}_{ij}(\beta_1, \beta_2, \boldsymbol{\theta}) = \frac{z_{ij} - t_{1,ij}\beta_1 - t_{2,ij}\beta_2}{1 + \theta_j \eta_{ij} / w_{1j}}. \quad (8.26)$$

Plugging (8.26) into (8.25), we obtain  $L_1(\widehat{\mathbf{s}}(\beta_1, \beta_2, \boldsymbol{\theta}), \beta_1, \beta_2, \boldsymbol{\theta})$ , denoted as  $L_2(\beta_1, \beta_2, \boldsymbol{\theta})$ :

$$L_2(\beta_1, \beta_2, \boldsymbol{\theta}) = \left( \sum_{i=2}^m \sum_{j=1}^d + \sum_{i=1}^1 \sum_{j=2}^d \right) \left[ \frac{(z_{ij} - t_{1,ij}\beta_1 - t_{2,ij}\beta_2)^2}{(1 + \theta_j \eta_{ij} / w_{1j})} \right] + \lambda_1 \sum_{j=1}^d w_{0j} |\beta_j| \\ + \tau_1 \sum_{j=1}^d w_{1j} \theta_j \quad (8.27)$$

**Step 2: Prove  $\mathcal{P}_{1j}\widehat{g} = 0 \iff \mathcal{P}_{1j}g_0 = 0$**

In this step we consider selection consistency for  $\mathcal{P}_{1j}g$ . We first verify that  $L_2(\beta_1, \beta_2, \boldsymbol{\theta})$  in (8.27) is convex in  $\boldsymbol{\theta}$  for any fixed values of  $\beta_1$  and  $\beta_2$  by obtaining that

$$\frac{\partial^2 L_2(\beta_1, \beta_2, \boldsymbol{\theta})}{\partial \theta_j^2} = 2 \left( \sum_{i=2}^m \sum_{j=1}^d + \sum_{i=1}^1 \sum_{j=2}^d \right) \left[ \frac{\eta_{ij}^2 (z_{ij} - t_{1,ij}\beta_1 - t_{2,ij}\beta_2)^2}{(1 + \theta_j \eta_{ij} / w_{1j})^3} \right] > 0, \\ \frac{\partial^2 L_2(\beta_1, \beta_2, \boldsymbol{\theta})}{\partial \theta_j \partial \theta_k} = 0 \text{ for } j \neq k.$$

By the above convexity, we know  $\widehat{\theta}_j = 0$  if and only if

$$\left( \frac{\partial}{\partial \theta_j} \Big|_{\theta_j=0} \right) L_2(\widehat{\beta}_1, \widehat{\beta}_2, \boldsymbol{\theta}) \geq 0,$$

which is equivalent to

$$U_1 \equiv \sum_{i=2}^m \eta_{i1} (z_{i1} - t_{1,i1}\widehat{\beta}_1 - t_{2,i1}\widehat{\beta}_2)^2 \leq \tau_1 w_{11}^2, \quad (8.28)$$

$$U_j \equiv \sum_{i=1}^m \eta_{ij} (z_{ij} - t_{1,ij}\widehat{\beta}_1 - t_{2,ij}\widehat{\beta}_2)^2 \leq \tau_1 w_{1j}^2 \text{ for } j \geq 2. \quad (8.29)$$

We define  $a_{ij} = \zeta'_{ij} \mathbf{G}_1/n$ , where  $\mathbf{G}_1 = (G_1(\mathbf{x}_1), \dots, G_1(\mathbf{x}_n))'$  and  $G_1(\mathbf{x}_i) = \sum_{j=1}^d g_{1j}^0(x_{ij})$ . Combining the fact that  $z_{ij} = \zeta'_{ij} \mathbf{y}/n$ , we have the following equation:

$$z_{ij} - t_{1,ij} \beta_1^0 - t_{2,ij} \beta_2^0 = a_{ij} + e_{ij}, \quad (8.30)$$

where  $e_{ij} \stackrel{i.i.d.}{\sim} N(0, \sigma^2/n)$  for  $1 \leq i \leq m$  and  $1 \leq j \leq d$ . Thus, (8.28) and (8.29) become

$$U_1 = \sum_{i=2}^m \eta_{i1} \left( t_{1,i1} (\beta_1^0 - \hat{\beta}_1) + t_{2,i1} (\beta_2^0 - \hat{\beta}_2) + e_{i1} + a_{i1} \right)^2, \quad (8.31)$$

$$U_j = \sum_{i=1}^m \eta_{ij} \left( t_{1,ij} (\beta_1^0 - \hat{\beta}_1) + t_{2,ij} (\beta_2^0 - \hat{\beta}_2) + e_{ij} + a_{ij} \right)^2 \quad (8.32)$$

by considering (8.30).

In the below, without loss of generality, we assume that  $g_{12}^0(x_{i2}) = 0$  for  $i = 1, \dots, n$ . We first show " $\mathcal{P}_{12} g_0 = 0 \implies \mathcal{P}_{12} \hat{g} = 0$ ". To show  $\mathcal{P}_{12} \hat{g} = 0$ , it suffices to show

$$P(U_2 > \tau_1 w_{12}^2) \rightarrow 0. \quad (8.33)$$

based on the above analysis and (5.2). Note that  $\mathcal{P}_{12} g_0 = 0$  implies  $a_{i2} = 0$  for all  $1 \leq i \leq m$ . Thus, we have

$$\begin{aligned} P(U_2 > \tau_1 w_{12}) &= P \left( \sum_{i=1}^m \eta_{i2} \left( t_{1,i2} (\beta_1^0 - \hat{\beta}_1) + t_{2,i2} (\beta_2^0 - \hat{\beta}_2) + e_{i2} \right)^2 > \tau_1 w_{12}^2 \right) \\ &\leq P \left( \sum_{i=1}^m \eta_{i2} \left[ t_{1,i2}^2 (\hat{\beta}_1 - \beta_1^0)^2 + t_{2,i2}^2 (\hat{\beta}_2 - \beta_2^0)^2 + e_{i2}^2 \right] > \tau_1 w_{12}^2/3 \right) \\ &\leq \sum_{k=1}^2 P \left( \sum_{i=1}^m \eta_{i2} t_{k,i2}^2 (\hat{\beta}_k - \beta_k^0)^2 > \tau_1 w_{12}^2/9 \right) + P \left( \sum_{i=1}^m \eta_{i2} e_{i2}^2 > \tau_1 w_{12}^2/9 \right). \end{aligned} \quad (8.34)$$

The first inequality in the above follows from the Cauchy-Schwarz inequality. For  $k = 1, 2$ , we have

$$\begin{aligned} \sum_{i=1}^m \eta_{i2} t_{k,i2}^2 &\leq \sqrt{\sum_{i=1}^m \eta_{i2}^2} \sqrt{\sum_{i=1}^m t_{k,i2}^4} \leq \sqrt{\sum_{i=1}^m (n \eta_i)^2} \sqrt{\sum_{i=1}^m (\zeta'_{i2} \mathbf{t}_k/n)^4} \\ &\leq n^{-1} \times \sqrt{\sum_{i=1}^m \|\zeta_{i2}\|^4 \|\mathbf{t}_k\|^4} \\ &\leq n^{-1} \times O(n^{5/4}) = O(n^{1/4}) \end{aligned} \quad (8.35)$$

by considering  $\eta_1 = (720m^4)^{-1}$ ,  $\eta_i \sim i^{-4}$  for  $i = 2, \dots, m$ , and Holder's inequality. By adapting the arguments in Lemma 8.1, we can show

$$\|\hat{\beta} - \beta_0\| = O_P(n^{-1/5}). \quad (8.36)$$

Now we focus on the first two probabilities in (8.34). Combining (8.35), (8.36) and the condition that  $n^{3/20}\tau_1 w_{12}^2 \rightarrow \infty$ , we can show that they converge to zero. Let  $V_2 = \sum_{i=1}^m \eta_{i2} e_{i2}^2$ . Since  $e_{i2}$  follows  $N(0, \sigma^2/n)$  as discussed above, we have

$$E(nV_2) \sim \sigma^2 \text{ and } Var(nV_2) \sim \sigma^4. \quad (8.37)$$

As for the third probability in (8.34), we have

$$\begin{aligned} P(V_2 > \tau_1 w_{12}^2/9) &\leq P(|nV_2 - EnV_2| > n\tau_1 w_{12}^2/9 - EnV_2) \\ &\leq \frac{Var(nV_2)}{(n\tau_1 w_{12}^2/9 - EnV_2)^2} \rightarrow 0 \end{aligned}$$

where the second inequality follows from the Chebyshev's inequality and the condition that  $n\tau_1 w_{12}^2 \rightarrow \infty$ . This completes the proof of (8.33), thus shows " $\mathcal{P}_{12g_0} = 0 \implies \mathcal{P}_{12\hat{g}} = 0$ ".

Next we prove " $\mathcal{P}_{12\hat{g}} = 0 \implies \mathcal{P}_{12g_0} = 0$ " by showing the equivalent statement " $\mathcal{P}_{12g_0} \neq 0 \implies \mathcal{P}_{12\hat{g}} \neq 0$ ". To show  $\mathcal{P}_{12\hat{g}} \neq 0$ , it suffices to show

$$P(U_2 \leq \tau_1 w_{12}^2) \rightarrow 0 \quad (8.38)$$

based on the previous discussions. We first establish the following inequalities:

$$\begin{aligned} P(U_2 \leq \tau_1 w_{12}^2) &\leq P(|U_2 - EW_2| \geq EW_2 - \tau_1 w_{12}^2) \\ &\leq P(|U_2 - W_2| \geq (EW_2 - \tau_1 w_{12}^2)/2) + P(|W_2 - EW_2| \geq (EW_2 - \tau_1 w_{12}^2)/2) \\ &\leq I + II, \end{aligned}$$

where  $W_2 = \sum_{i=1}^m \eta_{i2}(e_{i2} + a_{i2})^2$ . By the Cauchy-Schwartz inequality, we have

$$|U_2 - W_2| \leq 4W_2 + 3 \sum_{k=1}^2 \sum_{i=1}^m \eta_{i2} t_{k,i2}^2 (\hat{\beta}_k - \beta_k^0)^2.$$

Thus, the term I can be further bounded by

$$\begin{aligned} I &\leq P(W_2 \geq (EW_2 - \tau_1 w_{12}^2)/16) + \sum_{k=1}^2 P\left(\sum_{i=1}^m \eta_{i2} t_{k,i2}^2 (\hat{\beta}_k - \beta_k^0)^2 \geq (EW_2 - \tau_1 w_{12}^2)/24\right) \\ &\leq I_1 + I_2. \end{aligned}$$

To analyze the order of  $I_1, I_2$  and  $II$ , we need to study the order of  $EW_2$  and  $VarW_2$ . Note

that  $\mathcal{P}_{12}g_0 \neq 0$  implies  $a_{i_0 2} \neq 0$  for some  $1 \leq i_0 \leq m$ . Thus, we have

$$\begin{aligned} E(W_2) &\geq E(\eta_{i_0 2}(e_{i_0 2} + a_{i_0 2})^2) \geq \eta_{i_0 2} a_{i_0 2}^2, \\ \text{Var}(W_2) &= \sum_{i=1}^m \eta_{i 2}^2 \text{Var}((e_{i 2} + a_{i 2})^2) = \sum_{i=1}^m \eta_{i 2}^2 (4n^{-1} a_{i 2}^2 \sigma^2 + 2n^{-2} \sigma^4) \\ &\leq 4n^{-1} \sigma^2 \sum_{i=1}^m a_{i 2}^2 + 2n^{-2} \sigma^4 \leq 4n^{-1} \sigma^2 \|\mathcal{P}_{12}g_0\|_2 + 2n^{-2} \sigma^2 = O(n^{-1}) \end{aligned} \quad (8.39)$$

$$\leq 4n^{-1} \sigma^2 \sum_{i=1}^m a_{i 2}^2 + 2n^{-2} \sigma^4 \leq 4n^{-1} \sigma^2 \|\mathcal{P}_{12}g_0\|_2 + 2n^{-2} \sigma^2 = O(n^{-1}) \quad (8.40)$$

By (8.39) and Lemma 8.1, we know  $(EW_2 - \tau_1 w_{12}^2)$  is bounded away from zero. Then, by Chebyshev's inequality, we have

$$II \lesssim \frac{\text{Var}(W_2)}{(EW_2 - \tau_1 w_{12}^2)^2} \rightarrow 0$$

by (8.40). As for the term  $I_2$ , we can also show it converges to zero by considering (8.35) and (8.36). For the term  $I_1$ , we have

$$I_2 = P(16(W_2 - EW_2) \geq -\tau_1 w_{12}^2 - 15EW_2) \lesssim \frac{\text{Var}(W_2)}{(\tau_1 w_{12}^2 + 15EW_2)^2} \rightarrow 0$$

since  $(EW_2 + \tau_1 w_{12}^2)$  is bounded away from zero and  $\text{Var}(W_2) = O(n^{-1})$ .

**Step 3: Prove  $\widehat{\beta}_j = 0 \iff \beta_j^0 = 0$**

In this step we consider selection consistency for  $\beta_j$ . Without loss of generality, we assume that  $\beta_2^0 = 0$ . First, we rewrite (8.27) as  $Q(\beta_1, \beta_2, \boldsymbol{\theta}) + \lambda_1 \sum_{j=1}^d w_{0j} |\beta_j| + \tau_1 \sum_{j=1}^d w_{1j} \theta_j$ . Applying the Taylor expansion to (8.27), we have

$$\begin{aligned} \frac{\partial L_2(\beta_1, \beta_2, \widehat{\boldsymbol{\theta}})}{\partial \beta_2} &= \frac{\partial Q(\beta_1, \beta_2, \widehat{\boldsymbol{\theta}})}{\partial \beta_2} + \lambda_1 w_{02} \text{sign}(\beta_2) \\ &= \frac{\partial Q(\beta_1^0, \beta_2^0, \widehat{\boldsymbol{\theta}})}{\partial \beta_2} + \frac{\partial^2 Q(\beta_1^0, \beta_2^0, \widehat{\boldsymbol{\theta}})}{\partial \beta_1 \partial \beta_2} (\beta_1 - \beta_1^0) + \frac{\partial^2 Q(\beta_1^0, \beta_2^0, \widehat{\boldsymbol{\theta}})}{\partial \beta_2^2} (\beta_2 - \beta_2^0) \\ &\quad + \lambda_1 w_{02} \text{sign}(\beta_2). \end{aligned} \quad (8.41)$$

Recall that  $\|\widehat{\boldsymbol{\beta}} - \boldsymbol{\beta}_0\| = O_P(n^{-1/5})$  by (8.36). Thus, in the below, we only consider  $\beta_1$  and  $\beta_2$  satisfying  $|\beta_1 - \beta_1^0| = O_P(n^{-1/5})$  and  $|\beta_2 - \beta_2^0| = O_P(n^{-1/5})$ .

By (8.30), the first term in (8.41) can be written as

$$\begin{aligned} &-2 \left( \sum_{i=2}^m \sum_{j=1}^d + \sum_{i=1}^1 \sum_{j=2}^d \right) \left[ \frac{(a_{ij} + e_{ij}) t_{2,ij}}{1 + \widehat{\theta}_j \eta_{ij} / w_{1j}} \right] \\ &= -2 \left( \sum_{i=2}^m \sum_{j=1}^d + \sum_{i=1}^1 \sum_{j=2}^d \right) \left[ \frac{\mathbf{G}'_1 \boldsymbol{\zeta}_{ij} \boldsymbol{\zeta}'_{ij} \mathbf{t}_2 + \boldsymbol{\epsilon}' \boldsymbol{\zeta}_{ij} \boldsymbol{\zeta}'_{ij} \mathbf{t}_2}{n^2 (1 + \widehat{\theta}_j \eta_{ij} / w_{1j})} \right] \\ &= O_P(n^{-1/2}), \end{aligned} \quad (8.42)$$

where the last equality follows from the orthogonality of the constructed  $\{\zeta_{ij}\}$  and Lindeberger-Feller theorem. As for the second term of (8.41), we have

$$\begin{aligned} \frac{\partial^2 Q(\beta_1^0, \beta_2^0, \widehat{\boldsymbol{\theta}})}{\partial \beta_1 \partial \beta_2}(\beta_1 - \beta_1^0) &= 2 \left( \left[ \sum_{i=2}^m \sum_{j=1}^d + \sum_{i=1}^1 \sum_{j=2}^d \right] \frac{t_{1,ij} t_{2,ij}}{1 + \widehat{\theta}_j \eta_{ij} / w_{1j}} (\beta_1 - \beta_1^0) \right) \\ &= 2 \left( \left[ \sum_{i=2}^m \sum_{j=1}^d + \sum_{i=1}^1 \sum_{j=2}^d \right] \frac{\mathbf{t}'_1 \zeta_{ij} \zeta'_{ij} \mathbf{t}_2}{n^2 (1 + \widehat{\theta}_j \eta_{ij} / w_{1j})} (\beta_1 - \beta_1^0) \right) \\ &\leq O(n^{-1}) O_P(n^{-1/5}) = O_P(n^{-6/5}), \end{aligned}$$

where the last inequality follows from the orthogonality of the constructed  $\{\zeta_{ij}\}$  and the forms of  $\mathbf{t}_1$  and  $\mathbf{t}_2$ , i.e. (8.22) and (8.23). By applying similar analysis to the third term in (8.41), we know its order is also  $O_P(n^{-1/5})$ . In summary, we have

$$\frac{\partial L_2(\beta_1, \beta_2, \widehat{\boldsymbol{\theta}})}{\partial \beta_2} = O_P(n^{-1/5}) + \lambda_1 w_{02} \text{sign}(\beta_2). \quad (8.43)$$

We first show “ $\beta_2^0 = 0 \implies \widehat{\beta}_2 = 0$ ”. If  $\beta_2^0 = 0$ , then the range of  $\beta_2$  in (8.43) is  $(-Cn^{-1/5}, Cn^{-1/5})$  for some  $C > 0$ . By the assumed condition that  $n^{1/5} \lambda_1 w_{02} \rightarrow \infty$ , we can conclude that  $\partial L_2(\beta_1, \beta_2, \widehat{\boldsymbol{\theta}}) / \partial \beta_2 < 0$  for  $\beta_2 \in (-Cn^{-1/5}, 0)$  and  $\partial L_2(\beta_1, \beta_2, \widehat{\boldsymbol{\theta}}) / \partial \beta_2 > 0$  for  $\beta_2 \in (0, Cn^{-1/5})$ . In other words, we have

$$L_2(\beta_1, 0, \widehat{\boldsymbol{\theta}}) = \min_{|\beta_2| \leq Cn^{-1/5}} L_2(\beta_1, \beta_2, \widehat{\boldsymbol{\theta}}) \text{ with probability tending to one,}$$

which implies  $\widehat{\beta}_2 = 0$ . We next show “ $\widehat{\beta}_2 = 0 \implies \beta_2^0 = 0$ ” by showing the equivalent statement that “ $\beta_2^0 \neq 0 \implies \widehat{\beta}_2 \neq 0$ ”. For simplicity, we assume  $\beta_2^0 = 1$  which means that  $\beta_2 \in (1 - Cn^{-1/5}, 1 + Cn^{-1/5})$ . Then, by considering the condition  $n^{1/5} \lambda_1 w_{02} \rightarrow \infty$  in (8.43), we have  $\partial L_2(\beta_1, \beta_2, \widehat{\boldsymbol{\theta}}) / \partial \beta_2 > 0$  which implies that  $\widehat{\beta}_2 > 0$ . This completes the whole proof.  $\square$
